# Supplementary material
Source: MDPI journal article supplement (https://www.mdpi.com/2073-4344/11/10/1245)
Supplement: s1 [file s1]

Supplementary Material

# Dehydroisomerisation of $\alpha$ -Pinene and Limonene to P-Cymene Over Silica-Supported ZnO in the Gas Phase

Aliyah Alsharif <sup>1,2</sup>, Natalie Smith <sup>1</sup>, Elena F. Kozhevnikova <sup>1</sup> and Ivan V. Kozhevnikov <sup>1,\*</sup>

<sup>1</sup> Department of Chemistry, University of Liverpool, Liverpool L69 7ZD, UK; A.A.Alsharif@liverpool.ac.uk (A.A.); sgnsmit5@student.liverpool.ac.uk (N.S.); efkozhev@liverpool.ac.uk (E.F.K.)

<sup>2</sup> Department of Chemistry, Faculty of Science, Al-Imam Muhammad Ibn Saud University, Riyadh 11564, Saudi Arabia; aalshareef@imamu.edu.sa

\* Correspondence: kozhev@liverpool.ac.uk; Tel.: +44-151-794-2938

**Citation:** Alsharif, A.; Smith, N.; Kozhevnikova, E.F.; Kozhevnikov, I.V. Dehydroisomerisation of  $\alpha$ -Pinene and Limonene to P-Cymene Over Silica-Supported ZnO in the Gas Phase. *Catalysts* **2021**, *11*, 1245. <https://doi.org/10.3390/catal11101245>

Academic Editor: Ken-ichi Fujita

Received: 29 September 2021

Accepted: 13 October 2021

Published: 16 October 2021

**Publisher's Note:** MDPI stays neutral with regard to jurisdictional claims in published maps and institutional affiliations.

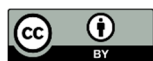

**Copyright:** © 2021 by the authors. Licensee MDPI, Basel, Switzerland. This article is an open access article distributed under the terms and conditions of the Creative Commons Attribution (CC BY) license (<http://creativecommons.org/licenses/by/4.0/>).

**Abstract:** Silica-supported zinc oxide possessing acid and dehydrogenation functions is an efficient, noble-metal-free bifunctional catalyst for the environment-friendly synthesis of p-cymene from renewable monoterpene feedstock by gas-phase dehydroisomerisation of  $\alpha$ -pinene and limonene in a fixed-bed reactor. The reaction involves acid-catalysed terpene isomerisation to p-menthadienes followed by dehydrogenation to form p-cymene. Dehydroisomerisation of  $\alpha$ -pinene produces p-cymene with 90% yield at 100% conversion at 370 °C and WHSV = 0.01–0.020 h<sup>−1</sup>. The reaction with limonene gives a 100% p-cymene yield at 325 °C and WHSV = 0.080 h<sup>−1</sup>. ZnO/SiO<sub>2</sub> catalyst shows stable performance for over 70 h without co-feeding hydrogen.

**Keywords:**  $\alpha$ -pinene; limonene; p-cymene; zinc oxide; bifunctional catalysis

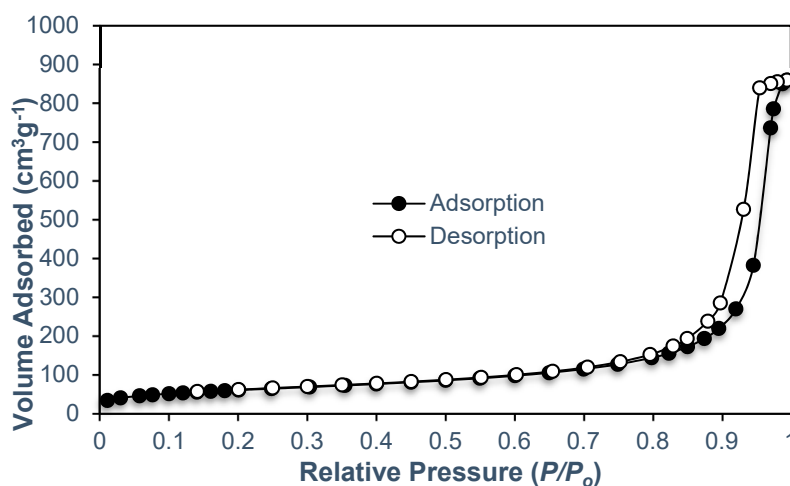

**Figure S1.** Nitrogen adsorption and desorption isotherms on fresh 10%ZnO/SiO<sub>2</sub>(300) with a H1 hysteresis loop typical of amorphous silica.

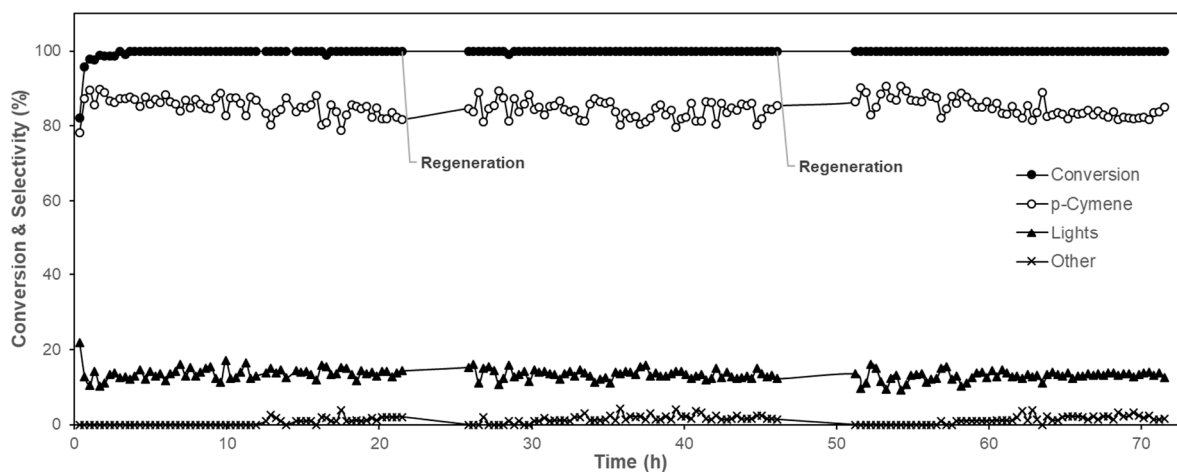

**Figure S2.** Long-term time course for  $\alpha$ -pinene dehydroisomerisation over 10%ZnO/SiO<sub>2</sub>(300) with catalyst regeneration: 0.80 g catalyst, 370 °C, 0.48 kPa  $\alpha$ -pinene partial pressure, 10 mL min<sup>-1</sup> flow rate, WHSV = 0.020 h<sup>-1</sup>; the catalyst regenerated in situ by air flow (10 mL min<sup>-1</sup>) at 370 °C for 3 h. Average p-cymene selectivity 85% at 100% p-cymene conversion over 70 h TOS.

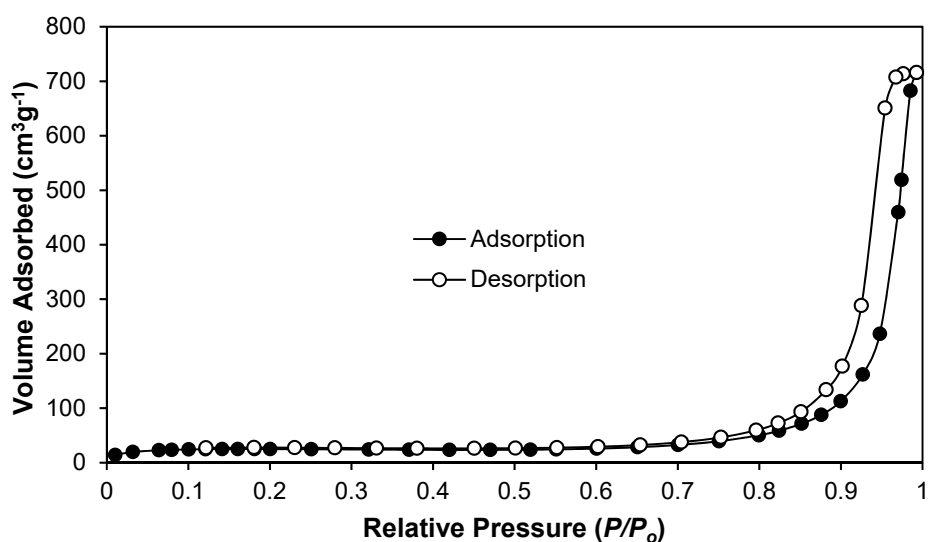

**Figure S3.** Nitrogen adsorption and desorption isotherms on spent 10%ZnO/SiO<sub>2</sub>(300) catalyst after  $\alpha$ -pinene dehydroisomerisation at 370 °C, 0.48 kPa  $\alpha$ -pinene partial pressure, 10 mL min<sup>-1</sup> flow rate, WHSV = 0.020 h<sup>-1</sup>, 24 h TOS. BET surface area, 87 m<sup>2</sup>g<sup>-1</sup>; single point total pore volume, 0.71 cm<sup>3</sup>g<sup>-1</sup>; average pore diameter by BET, 329 Å.

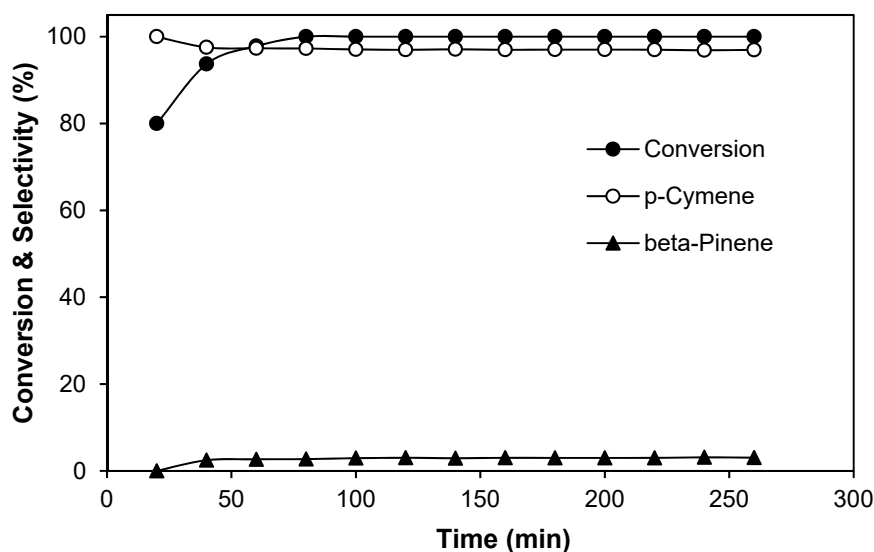

**Figure S4.** Time course for limonene dehydroisomerisation over 20%ZnO/SiO<sub>2</sub>(300):0.20 g catalyst, 300 °C, 0.47 kPa limonene partial pressure, 10 ml min<sup>-1</sup> flow rate, WHSV = 0.080 h<sup>-1</sup>.

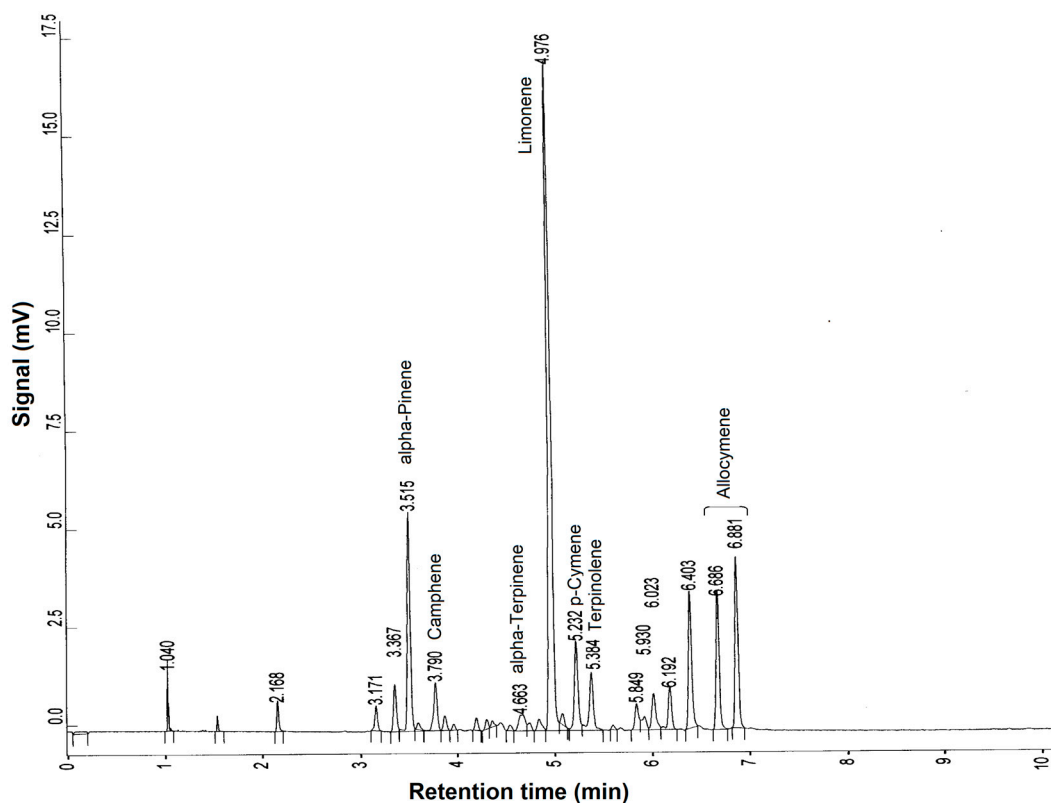

**Figure S5.** GC trace showing product mixture for  $\alpha$ -pinene conversion over bulk Zn–Fe mixed oxide at 350 °C, 0.48 kPa  $\alpha$ -pinene partial pressure and 10 mL min<sup>-1</sup> flow rate to illustrate high resolution of product analysis. The Zn–Fe oxide had much lower activity and selectivity than ZnO/SiO<sub>2</sub>, yielding a wide range of by-products. In dehydroisomerisation of  $\alpha$ -pinene and limonene on ZnO/SiO<sub>2</sub>, much smaller amounts of by-products were formed (Figure S6). From GC traces,  $\alpha$ -pinene, limonene, p-cymene,  $\alpha$ -terpinene, terpinolene,  $\beta$ -pinene, and camphene were quantified individually. Other p-menthadienes were lumped together as “other” and the cracking products, appearing before  $\alpha$ -pinene (retention time 0–3.5 min), as “lights”.

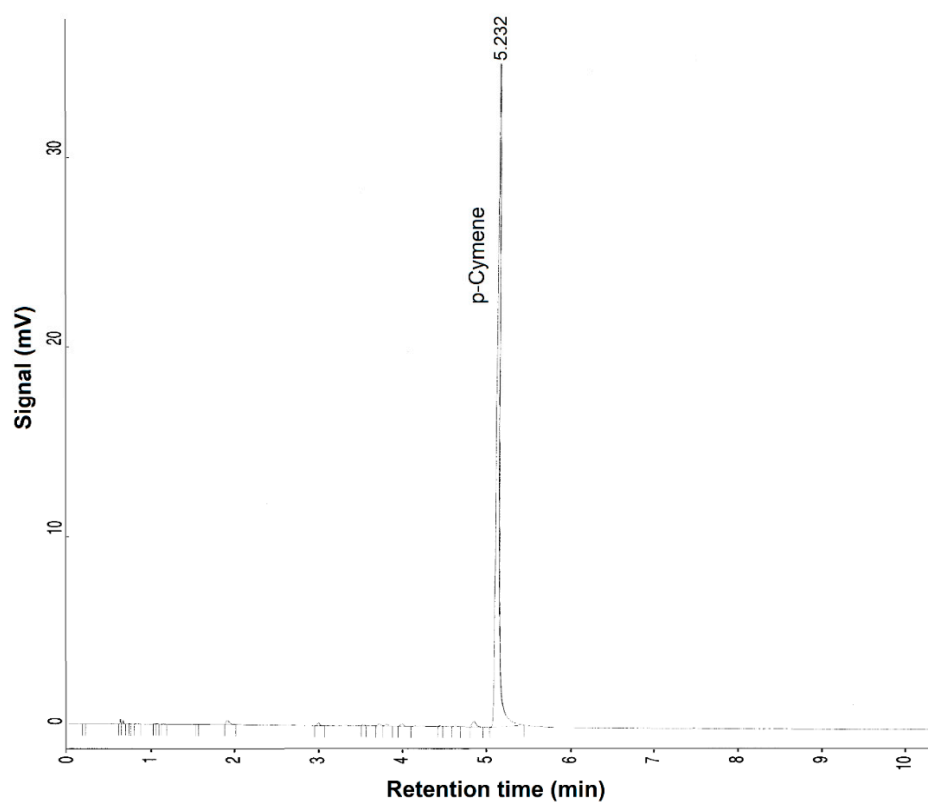

**Figure S6.** GC trace for limonene conversion over 30%ZnO/SiO<sub>2</sub>(300): 0.20 g catalyst, 0.47 kPa limonene partial pressure, 10 mL min<sup>-1</sup> flow rate, WHSV = 0.080 h<sup>-1</sup>.
